# Supplementary material for: Unique intrahepatic transcriptomics profiles discriminate the clinical phases of a chronic HBV infection
Source: PubMed Central journal article supplement (PMC5491066; doi:10.1371/journal.pone.0179920), 2017-06-29
Supplement: pone.0179920.s004.pdf [file pone.0179920.s004.pdf]

S3 Table. The top varied modules with determined function were clustered into 2 clusters based on their transcriptional activity relative to the IT phase, which had distinct activity patterns in HBV clinical phases

| * ModuleID = the ID of transcriptomics modules developed by Chaussabel et al. Immunity 29, 150-164 (2008)<br>( <a href="http://www.biir.net/public_wikis/module_annotation/V2_Trial_8_Modules">http://www.biir.net/public_wikis/module_annotation/V2_Trial_8_Modules</a> ), nr. of genes = number of genes included in the module, STDEV = Standard deviation of relative transcriptional activity of the module across all clinical phases, STDEV_Percentiles = the rank of the STDEV in the data set of all STDEVs of 260 modules, IFC = Intrinsic functional cluster, generated by unsupervised clustering of relative transcriptional activities. |                   |                                 |              |          |          |            |       |                                     |                                                                     |
|-------------------------------------------------------------------------------------------------------------------------------------------------------------------------------------------------------------------------------------------------------------------------------------------------------------------------------------------------------------------------------------------------------------------------------------------------------------------------------------------------------------------------------------------------------------------------------------------------------------------------------------------------------|-------------------|---------------------------------|--------------|----------|----------|------------|-------|-------------------------------------|---------------------------------------------------------------------|
| Module Group                                                                                                                                                                                                                                                                                                                                                                                                                                                                                                                                                                                                                                          | ModuleID          | Module Name                     | nr. of genes | IA vs IT | IC vs IT | ENEG vs IT | STDEV | STDEV Percentiles                   | Gene Fold change > 1.5                                              |
| Cluster1                                                                                                                                                                                                                                                                                                                                                                                                                                                                                                                                                                                                                                              | M5.10             | Mitochondrial Respiration       | 237          | -3.10    | 2.91     | -2.54      | 3.32  | 0.99                                | CCDC127;CISH;KIFAP3;NUDT2;PARN;WIBG                                 |
|                                                                                                                                                                                                                                                                                                                                                                                                                                                                                                                                                                                                                                                       | M3.5              | Cell Cycle                      | 151          | -2.64    | 2.89     | -2.63      | 3.19  | 0.98                                | SAAL1                                                               |
|                                                                                                                                                                                                                                                                                                                                                                                                                                                                                                                                                                                                                                                       | M6.2              | Mitochondrial Respiration       | 158          | -3.10    | 2.71     | -3.86      | 3.60  | 1.00                                | ARD1A;FBXL15;TBP                                                    |
|                                                                                                                                                                                                                                                                                                                                                                                                                                                                                                                                                                                                                                                       | M5.6              | Mitochondrial Stress/Proteasome | 143          | -1.78    | 3.34     | -3.43      | 3.53  | 0.99                                | XRCC6BP1                                                            |
|                                                                                                                                                                                                                                                                                                                                                                                                                                                                                                                                                                                                                                                       | M7.1              | Inflammation                    | 184          | -0.17    | 3.17     | -1.08      | 2.24  | 0.93                                | ACPP;FKSG30;GBGT1;IIP45;NCF2;PTPN6;RAB38;RIPK3;SH2B2;SLC16A5;ZNF213 |
|                                                                                                                                                                                                                                                                                                                                                                                                                                                                                                                                                                                                                                                       | M5.1              | Inflammation                    | 248          | -0.18    | 3.75     | -1.52      | 2.74  | 0.95                                | BTBD10;GADD45G;GNA15;GNAI3;LOXL3;MAP3K8;RASSF3                      |
| M4.5                                                                                                                                                                                                                                                                                                                                                                                                                                                                                                                                                                                                                                                  | Protein Synthesis | 89                              | 0.37         | 3.77     | -1.78    | 2.80       | 0.95  | NACAP1                              |                                                                     |
| Cluster2                                                                                                                                                                                                                                                                                                                                                                                                                                                                                                                                                                                                                                              | M3.3              | Cell Cycle                      | 50           | 5.92     | -2.08    | 2.61       | 4.02  | 1.00                                | APOBEC3B;ASPM;AURKA;C12orf48;CCNB2;CDC20;CDT1;GINS2;KIF11;N         |
|                                                                                                                                                                                                                                                                                                                                                                                                                                                                                                                                                                                                                                                       | M4.10             | B cell                          | 36           | 4.04     | -1.44    | 1.80       | 2.75  | 0.95                                | CAPG;RRM2;TIMD4;TPX2;UHRF1                                          |
|                                                                                                                                                                                                                                                                                                                                                                                                                                                                                                                                                                                                                                                       | M6.16             | Cell Cycle                      | 32           | 3.15     | -1.83    | 0.80       | 2.49  | 0.96                                | BLR1;BRDG1;C9orf45;CD19;EBF1;FCRLA;HLA-DOB;LOC90925                 |
|                                                                                                                                                                                                                                                                                                                                                                                                                                                                                                                                                                                                                                                       | M6.11             | Cell Cycle                      | 20           | 0.88     | -3.65    | -0.14      | 2.38  | 0.94                                | APOBEC3H;CENPF;MCM2;SGOL1;UBE2T                                     |
|                                                                                                                                                                                                                                                                                                                                                                                                                                                                                                                                                                                                                                                       | M8.46             | Cytotoxic/NK                    | 19           | 5.22     | 1.20     | 5.40       | 2.38  | 0.97                                | CDC25A                                                              |
|                                                                                                                                                                                                                                                                                                                                                                                                                                                                                                                                                                                                                                                       |                   |                                 |              |          |          |            |       |                                     | BTNL3;CXCR6;GZMB;KIR2DL4;KIR2DS5;KLRB1;PTGDR                        |
| IFC1                                                                                                                                                                                                                                                                                                                                                                                                                                                                                                                                                                                                                                                  | M8.65             | Undetermined                    | 12           | 1.00     | -1.75    | 1.93       | 1.91  | 0.94                                | GHRL                                                                |
|                                                                                                                                                                                                                                                                                                                                                                                                                                                                                                                                                                                                                                                       | M7.32             | Undetermined                    | 15           | 0.26     | -1.73    | 1.51       | 1.64  | 0.92                                | TNFRSF13B                                                           |
|                                                                                                                                                                                                                                                                                                                                                                                                                                                                                                                                                                                                                                                       | M9.51             | Undetermined                    | 12           | -1.00    | -2.07    | 1.06       | 1.59  | 1.00                                | NPPA                                                                |
|                                                                                                                                                                                                                                                                                                                                                                                                                                                                                                                                                                                                                                                       | M8.71             | Undetermined                    | 12           | 1.82     | -1.96    | -0.40      | 1.90  | 0.93                                | MGC226718                                                           |
|                                                                                                                                                                                                                                                                                                                                                                                                                                                                                                                                                                                                                                                       | M7.27             | Undetermined                    | 36           | 0.29     | 3.05     | 0.05       | 1.67  | 0.91                                | RCVRN;TMEM88                                                        |
|                                                                                                                                                                                                                                                                                                                                                                                                                                                                                                                                                                                                                                                       | M9.16             | Undetermined                    | 75           | 0.15     | 3.28     | -0.36      | 1.97  | 0.94                                | CCNYL1;CCRN4L;CYB5R2                                                |
|                                                                                                                                                                                                                                                                                                                                                                                                                                                                                                                                                                                                                                                       | M5.5              | Undetermined                    | 249          | 0.42     | 4.83     | -0.39      | 2.81  | 0.96                                | CAMSAP1;DDX10;LOC92017;SAMM50;TEX264;TRAF3IP3;ZNF211;ZNF614         |
|                                                                                                                                                                                                                                                                                                                                                                                                                                                                                                                                                                                                                                                       | M7.3              | Undetermined                    | 173          | 0.17     | 4.29     | -1.15      | 2.84  | 0.98                                |                                                                     |
|                                                                                                                                                                                                                                                                                                                                                                                                                                                                                                                                                                                                                                                       | M5.8              | Undetermined                    | 113          | 1.49     | 5.62     | -0.37      | 3.07  | 0.98                                | AOF2;AP4B1;C17orf68;EIF2B5;GPD1L;TIMM22;TTF2                        |
|                                                                                                                                                                                                                                                                                                                                                                                                                                                                                                                                                                                                                                                       | M7.25             | Undetermined                    | 106          | 1.28     | 3.77     | -0.31      | 2.06  | 0.96                                | C17orf68;NAT9;TMC6;TUBG2;WDR73                                      |
|                                                                                                                                                                                                                                                                                                                                                                                                                                                                                                                                                                                                                                                       | M4.12             | Undetermined                    | 95           | 1.79     | 4.93     | 0.21       | 2.40  | 0.91                                | ALKBH3;NXT1;PCID2                                                   |
|                                                                                                                                                                                                                                                                                                                                                                                                                                                                                                                                                                                                                                                       | M5.4              | Undetermined                    | 132          | -2.49    | 3.92     | -2.46      | 3.69  | 1.00                                |                                                                     |
|                                                                                                                                                                                                                                                                                                                                                                                                                                                                                                                                                                                                                                                       | M9.15             | Undetermined                    | 78           | -0.33    | 3.49     | -1.18      | 2.49  | 1.00                                | C18orf26;C6orf81;JAG1;SYCP2                                         |
|                                                                                                                                                                                                                                                                                                                                                                                                                                                                                                                                                                                                                                                       | M8.6              | Undetermined                    | 37           | -0.62    | 2.43     | -1.41      | 2.03  | 0.96                                | ZNF589;ZNF761                                                       |
|                                                                                                                                                                                                                                                                                                                                                                                                                                                                                                                                                                                                                                                       | M8.2              | Undetermined                    | 51           | -1.53    | 2.62     | -1.24      | 2.32  | 0.98                                |                                                                     |
|                                                                                                                                                                                                                                                                                                                                                                                                                                                                                                                                                                                                                                                       | M5.13             | Undetermined                    | 182          | -2.57    | 3.90     | -3.40      | 4.00  | 1.00                                | ANKRD37;CD48;COMMD2                                                 |
| M7.11                                                                                                                                                                                                                                                                                                                                                                                                                                                                                                                                                                                                                                                 | Undetermined      | 134                             | -1.01        | 3.94     | -1.32    | 2.95       | 0.99  | DNASE2;NFKBIE;OBFC1;P15RS;ZFY       |                                                                     |
| M7.19                                                                                                                                                                                                                                                                                                                                                                                                                                                                                                                                                                                                                                                 | Undetermined      | 99                              | -0.93        | 4.18     | -1.60    | 3.16       | 1.00  | EXOSC7                              |                                                                     |
| M9.8                                                                                                                                                                                                                                                                                                                                                                                                                                                                                                                                                                                                                                                  | Undetermined      | 100                             | -0.37        | 3.59     | -1.65    | 2.73       | 1.00  | CGRRF1;FKBPL;GZF1;SPATA2            |                                                                     |
| M9.28                                                                                                                                                                                                                                                                                                                                                                                                                                                                                                                                                                                                                                                 | Undetermined      | 47                              | -0.78        | 2.62     | -1.07    | 2.05       | 1.00  | SMC6                                |                                                                     |
| M7.20                                                                                                                                                                                                                                                                                                                                                                                                                                                                                                                                                                                                                                                 | Undetermined      | 48                              | -1.10        | 2.52     | -1.82    | 2.32       | 0.97  | ANP32C;SNRPE                        |                                                                     |
| M7.5                                                                                                                                                                                                                                                                                                                                                                                                                                                                                                                                                                                                                                                  | Undetermined      | 156                             | -0.99        | 2.84     | -1.55    | 2.39       | 0.96  | ANKRD13C;COMMD9;ZFP90;ZNF263;ZSCAN2 |                                                                     |
| M6.7                                                                                                                                                                                                                                                                                                                                                                                                                                                                                                                                                                                                                                                  | Undetermined      | 76                              | -0.02        | 3.45     | -1.84    | 2.69       | 0.97  | LPXN;LRRRC8C                        |                                                                     |
| M7.9                                                                                                                                                                                                                                                                                                                                                                                                                                                                                                                                                                                                                                                  | Undetermined      | 167                             | -0.63        | 2.35     | -1.33    | 1.96       | 0.92  | FUT4                                |                                                                     |
| M7.8                                                                                                                                                                                                                                                                                                                                                                                                                                                                                                                                                                                                                                                  | Undetermined      | 112                             | -1.88        | 2.50     | -3.45    | 3.08       | 0.99  |                                     |                                                                     |
| M7.6                                                                                                                                                                                                                                                                                                                                                                                                                                                                                                                                                                                                                                                  | Undetermined      | 104                             | -0.04        | 3.37     | -1.38    | 2.45       | 0.96  | KCNA3;MCM5;NOLC1;SH3PXD2A           |                                                                     |
| M7.4                                                                                                                                                                                                                                                                                                                                                                                                                                                                                                                                                                                                                                                  | Undetermined      | 140                             | -0.96        | 2.85     | -2.04    | 2.57       | 0.97  | C3orf21;RFWD3;TMEM138;UCHL5IP       |                                                                     |
| IFC4                                                                                                                                                                                                                                                                                                                                                                                                                                                                                                                                                                                                                                                  | M7.30             | Undetermined                    | 72           | -3.62    | 1.43     | -2.40      | 2.63  | 0.99                                | RNPC3;SAP30                                                         |
|                                                                                                                                                                                                                                                                                                                                                                                                                                                                                                                                                                                                                                                       | M9.21             | Undetermined                    | 66           | -2.26    | 0.47     | -2.01      | 1.51  | 0.94                                | MYCBP;P2RY12;VEPH1                                                  |
|                                                                                                                                                                                                                                                                                                                                                                                                                                                                                                                                                                                                                                                       | M9.3              | Undetermined                    | 173          | -3.56    | 1.01     | -4.06      | 2.79  | 1.00                                | CD300LB;CEP164;COL9A2;MYL5;NDST2;PNMA6A;PPFIA4;SMPD2;WDR25          |
|                                                                                                                                                                                                                                                                                                                                                                                                                                                                                                                                                                                                                                                       | M9.52             | Undetermined                    | 11           | -1.67    | -0.20    | -1.89      | 0.92  | 1.00                                |                                                                     |
|                                                                                                                                                                                                                                                                                                                                                                                                                                                                                                                                                                                                                                                       | M6.10             | Undetermined                    | 79           | -3.05    | 1.50     | -3.32      | 2.71  | 0.97                                |                                                                     |
|                                                                                                                                                                                                                                                                                                                                                                                                                                                                                                                                                                                                                                                       | M7.28             | Undetermined                    | 71           | -1.50    | 1.77     | -1.80      | 1.98  | 0.95                                |                                                                     |
|                                                                                                                                                                                                                                                                                                                                                                                                                                                                                                                                                                                                                                                       | M9.23             | Undetermined                    | 57           | -1.29    | 0.69     | -1.67      | 1.27  | 0.93                                | C20orf103;CCL3L1                                                    |
|                                                                                                                                                                                                                                                                                                                                                                                                                                                                                                                                                                                                                                                       | M9.20             | Undetermined                    | 66           | -1.88    | 1.61     | -2.25      | 2.13  | 1.00                                | GPR174                                                              |
|                                                                                                                                                                                                                                                                                                                                                                                                                                                                                                                                                                                                                                                       | M9.17             | Undetermined                    | 75           | -1.13    | 1.63     | -1.93      | 1.87  | 0.94                                | CDC25C;ZNF341                                                       |
|                                                                                                                                                                                                                                                                                                                                                                                                                                                                                                                                                                                                                                                       | M8.3              | Undetermined                    | 48           | -1.60    | 0.70     | -2.51      | 1.65  | 0.93                                | RPUSD1                                                              |
|                                                                                                                                                                                                                                                                                                                                                                                                                                                                                                                                                                                                                                                       | M8.84             | Undetermined                    | 10           | -1.10    | 1.12     | -2.37      | 1.77  | 0.91                                |                                                                     |
